# Supplementary material for: A stillbirth calculator: Development and internal validation of a clinical prediction model to quantify stillbirth risk
Source: PLoS One. 2017 Mar 7;12(3):e0173461. doi: 10.1371/journal.pone.0173461 (PMC5340400; doi:10.1371/journal.pone.0173461)
Supplement: S1 File — (XLSX) [file pone.0173461.s004.xlsx]

## Sheet: Calculator 
S1 File
p=e^logit/(1+e^logit)
Logit=-6.8772-0.8707*Maternal age < 18 + 0.2094*maternal age 35-39 + 0.4377*maternal age > 40 + 0.8536*black race + 0.3423*nulliparity – .0219*BMI 25-29.9 + 0.5607*BMI 30-34.9 -0.5948*BMI 35-39.9 + 0.1593*BMI >40 + 0.2770*Currently_smoking+0.6255*CHTN + 0.9863*pre-gestational diabetes
Logit formula for excel	-6.8772
e	2.71828
Maternal Characteristic: enter 0= no 1=yes
Maternal age < 18	0
Maternal age 35-39	0
Maternal age > 40	0
Black race	0
Nulliparous	0
BMI 25-29.9 kg/m^2	0
BMI 30-34.9 kg/m^2	0
BMI 35-39.9 kg/m^2	0
BMI> 40 kg/m^2	0
Currently smoking	0
Chronic hypertension	0
Pre-gestational diabetes	0
Probabilityof Stillbirth at or beyond 32 weeks	0.00102996
per 10,000 live births	10.2996
